# Supplementary material
Source: PubMed Central journal article supplement (PMC8915366)
Supplement: bcr-2021-246922supp001.pdf [file bcr-2021-246922supp001.pdf]

**Steroid therapy and duration of treatment**

| <b>Steroid therapy</b>         | <b>Dose</b>      | <b>Duration</b> |
|--------------------------------|------------------|-----------------|
| Intravenous methylprednisolone | 500mg daily      | 3 days          |
| Oral prednisolone              | 30mg twice a day | 9 days          |
| Oral prednisolone              | 20mg twice a day | 7 days          |
| Oral prednisolone              | 15mg twice a day | 4 days          |
| Oral prednisolone              | 20mg daily       | 5 days          |
| Intravenous dexamethasone      | 6mg daily        | 6 days          |
| Oral dexamethasone             | 6mg daily        | 3 days          |
| Oral dexamethasone             | 4mg daily        | 5 days          |
| Oral dexamethasone             | 2mg daily        | 5 days          |
